# Supplementary material for: A new metal–organic open framework enabling facile synthesis of carbon encapsulated transition metal phosphide/sulfide nanoparticle electrocatalysts
Source: Royal Society of Chemistry journal article supplement (doi:10.1039/c9ta00404a), 2019-01-01
Supplement: c9ta00404a1.pdf [file c9ta00404a1.pdf]

*Supporting Information*

# A New Metal-Organic Open Framework Enabling Facile Synthesis of Carbon Encapsulated Transition Metal Phosphide/Sulfide Nanoparticle Electrocatalysts†

Baicheng Weng, Xiaoming Wang, Corey R. Grice, Fenghua Xu, and Yanfa Yan\*

\* Correspondence and requests for materials should be addressed to Y.F.Y. (email: [yanfa.yan@utoledo.edu](mailto:yanfa.yan@utoledo.edu)).

## Supporting Figures

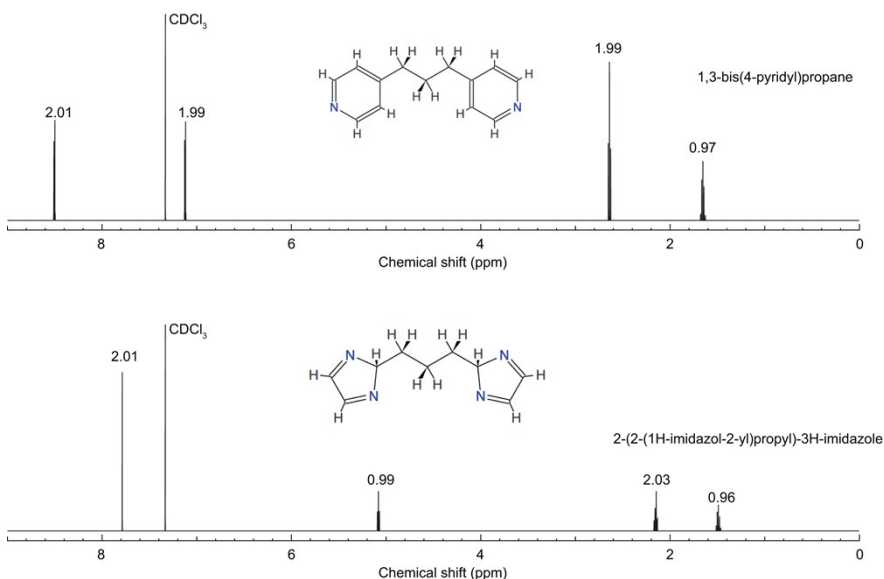

**Fig. S1.** <sup>1</sup>H NMR spectra of the obtained 1,3-Di(4-pyridyl)propane and 2-(2-(1H-imidazol-2-yl)propyl)-

3H-imidazole.

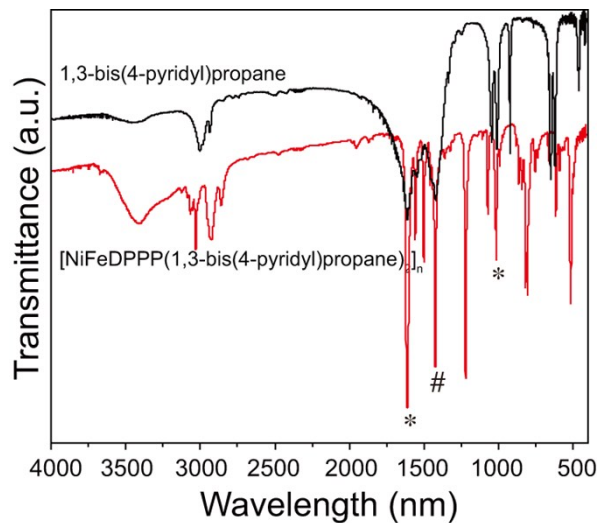

**Fig. S2.** FTIR patterns of the obtained 1,3-Di(4-pyridyl)propane (black curve) and  $[\text{NiFeDPPP}(1,3\text{-Di}(4\text{-pyridyl)propane})_2]_n$  (red curve). Asterisks: characteristic peaks of pyridine rings. Double-cross: characteristic peak of phenylphosphine groups.

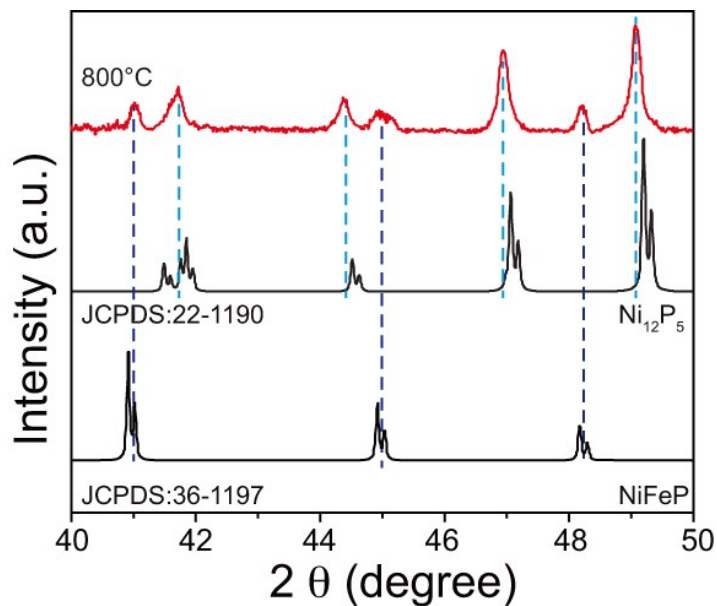

**Fig. S3.** XRD patterns of NiP/NiFeP/C between  $40^\circ$  and  $50^\circ$ . Reference diffraction patterns of standard  $\text{Ni}_{12}\text{P}_5$  and NiFeP are also labeled.

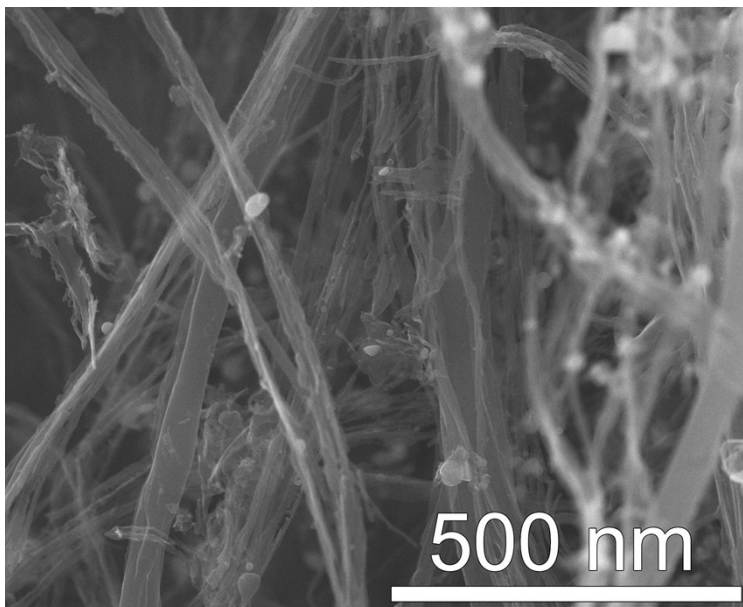

**Fig. S4.** SEM image of the obtained NiP/NiFeP/C, showing the carbon fibers.

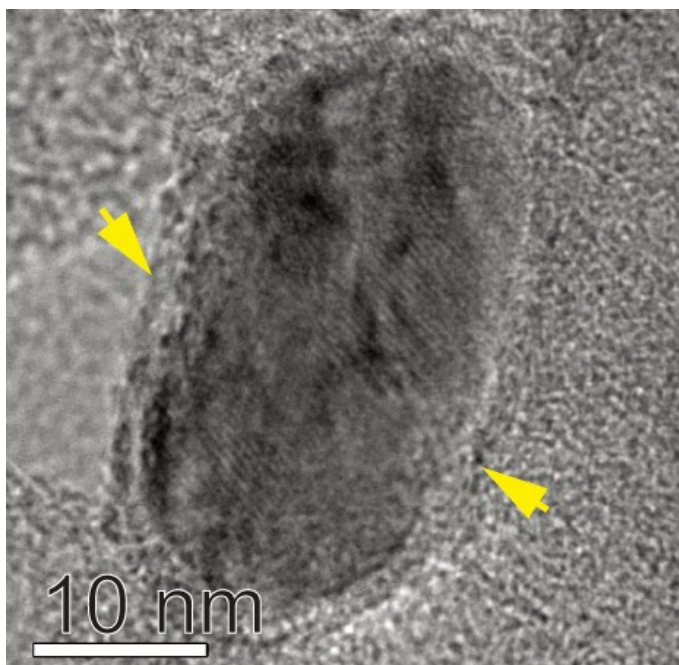

**Fig. S5.** TEM image of the obtained NiP/NiFeP/C. Yellow arrows show the amorphous shell the nanoparticle.

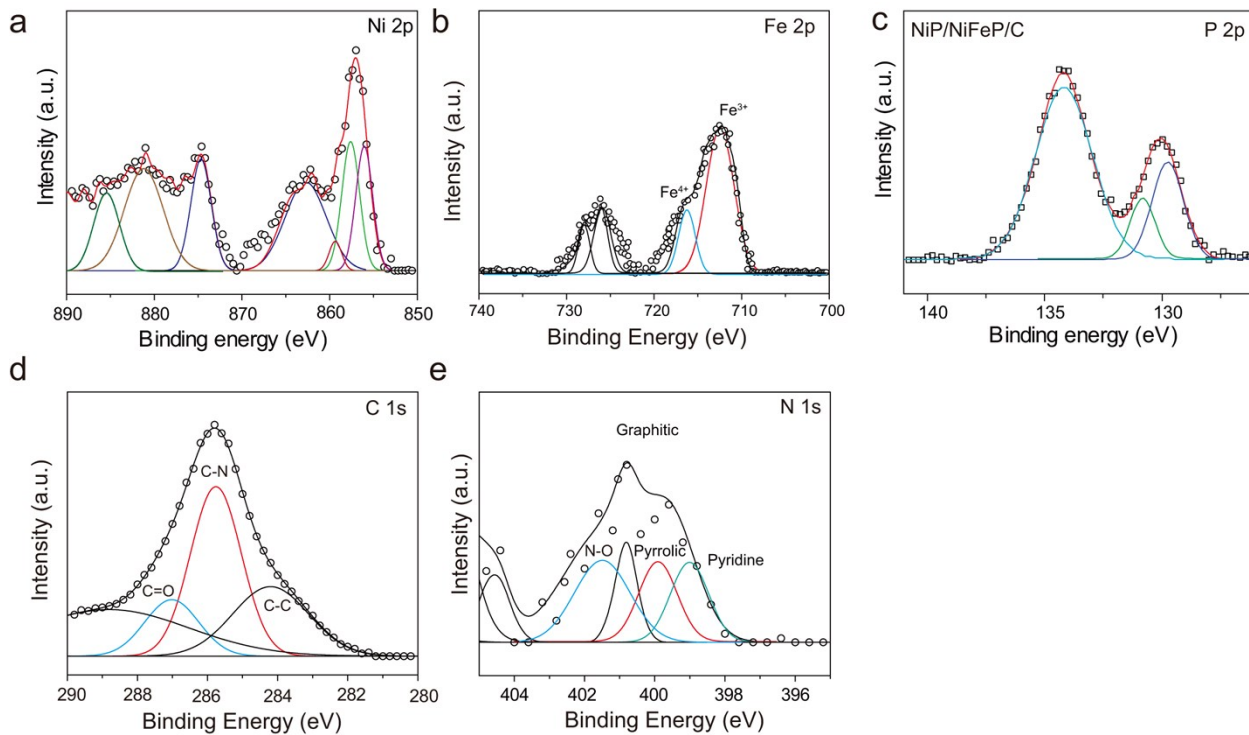

**Fig. S6.** XPS spectra of the Ni 2p, Fe 2p, P 2p, C 1s, and N 1s core-levels of NiP/NiFeP/C.

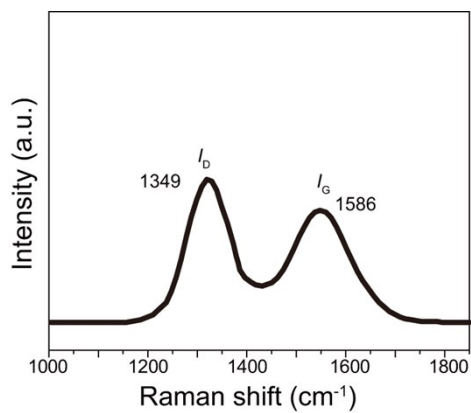

**Fig. S7.** Raman spectrum of NiP/NiFeP/C. The peak positions (1349 and 1586 cm<sup>-1</sup>) corresponding to *D* and *G* bands of heteroatom-doped carbon are also labeled.

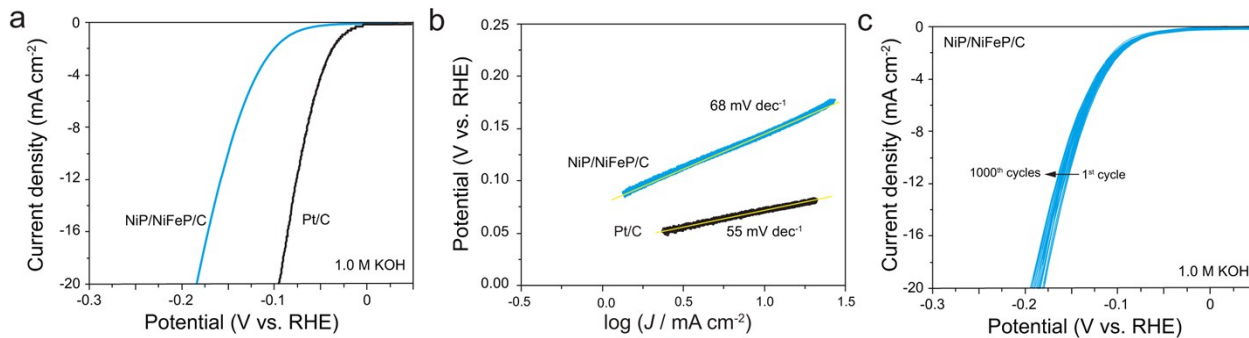

**Fig. S8.** HER performance of NiP/NiFeP/C and Pt/C in 1.0 M KOH. (a) Polarization curves. (b) Corresponding Tafel slopes. (c) Stability test of NiP/NiFeP/C for 1000 HER cycles. Pt/C (commercial Pt/C, 20% Pt) was compared as a reference. Pt/C shows an onset potential of 0 mV and achieves a stable current density of  $-10 \text{ mA cm}^{-2}$  at a potential of  $-73 \text{ mV}$  (vs. RHE) in 1.0 M KOH.<sup>S1, S2</sup>

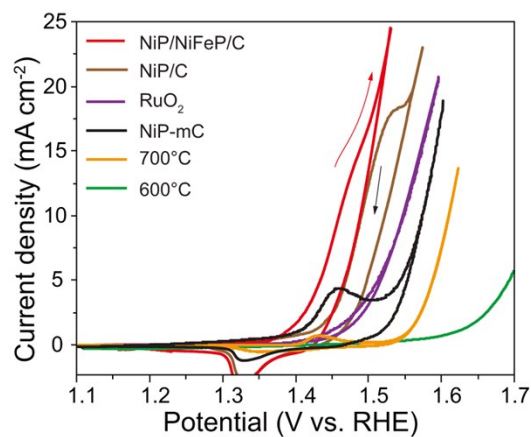

**Fig. S9.** Cyclic volumetric curves with both positive and negative scans of NiP/NiFeP/C and the samples obtained by pyrolysis of Ni, Fe-MOF at 600 °C and 700 °C for OER in 1.0 M KOH. RuO<sub>2</sub>, NiP/C and NiP-mC are also added for comparisons.

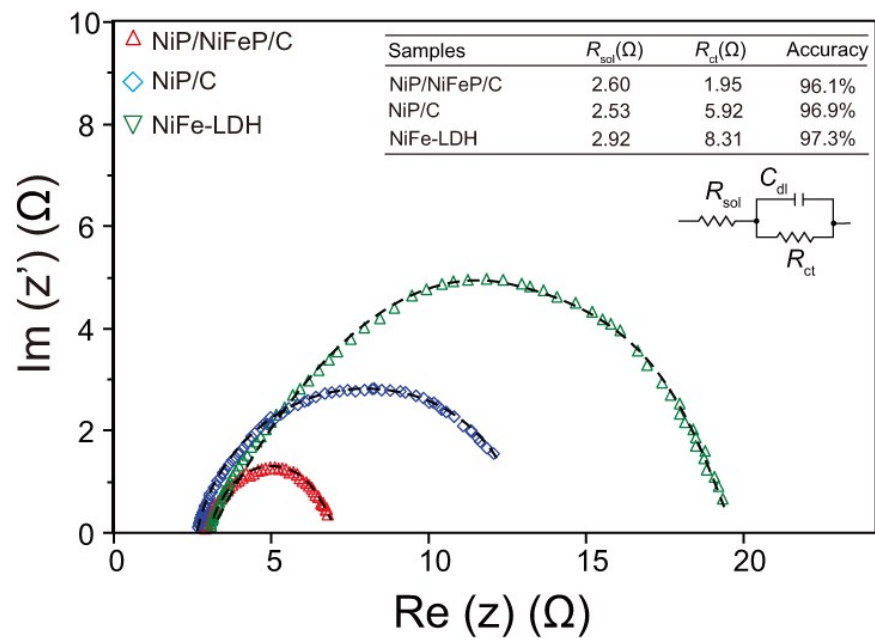

**Fig. S10.** EIS curves of the NiP/NiFeP/C, NiP/C, and NiFe-LDH samples. Inserted circuit model:  $R_{sol}$ : resistance of solution,  $R_{ct}$ : charge transfer resistance,  $C_{dl}$ : double-layer capacitance. Dash lines are the fitting curves according to the inserted circuit model. Inserted table shows equivalent circuit parameters obtained from EIS measurements.

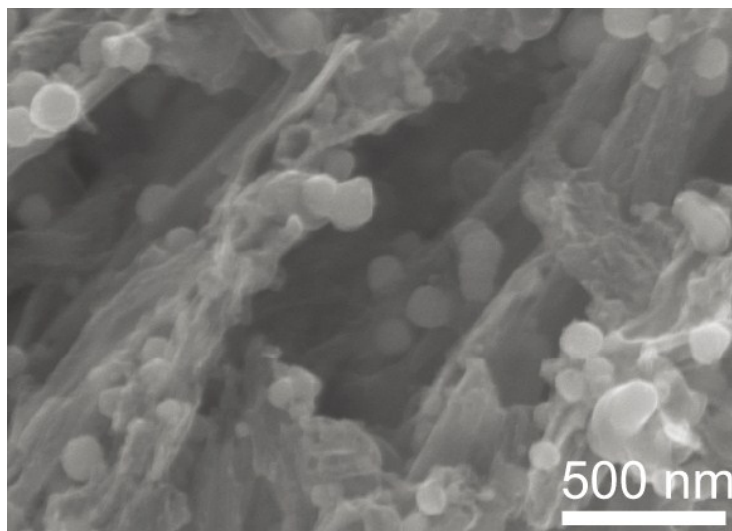

**Fig. S11.** SEM image of NiP/NiFeP/C after stability test.

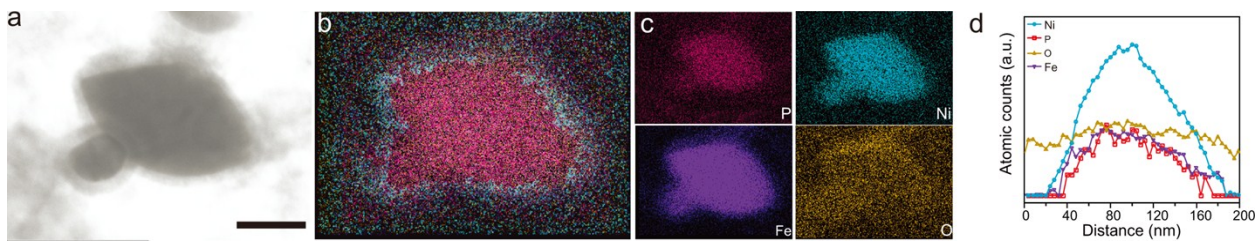

**Fig. S12.** STEM-EDS elemental mapping and linear scanning of the NiP/NiFeP/C after stability test. (a) STEM image. (b) Overlapping of elemental mapping. (c) P, Ni, Fe, and O elemental mapping. (d) Linear scanning of the NiP/NiFeP/C sample. Scale bar: 100 nm.

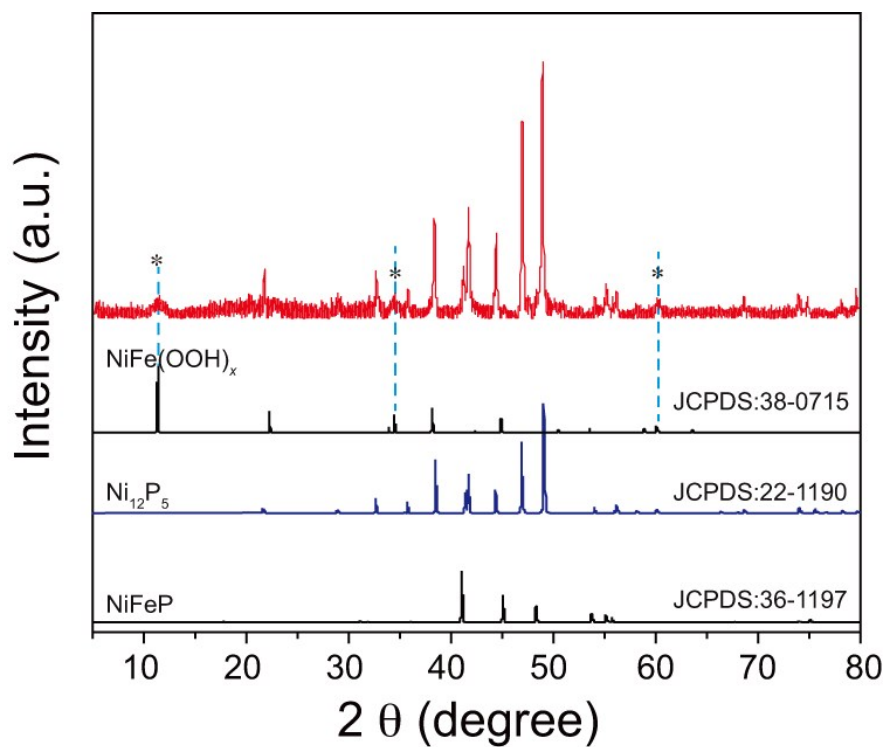

**Fig. S13.** XRD pattern of the NiP/NiFeP/C after stability test. The dash lines are added for eye.

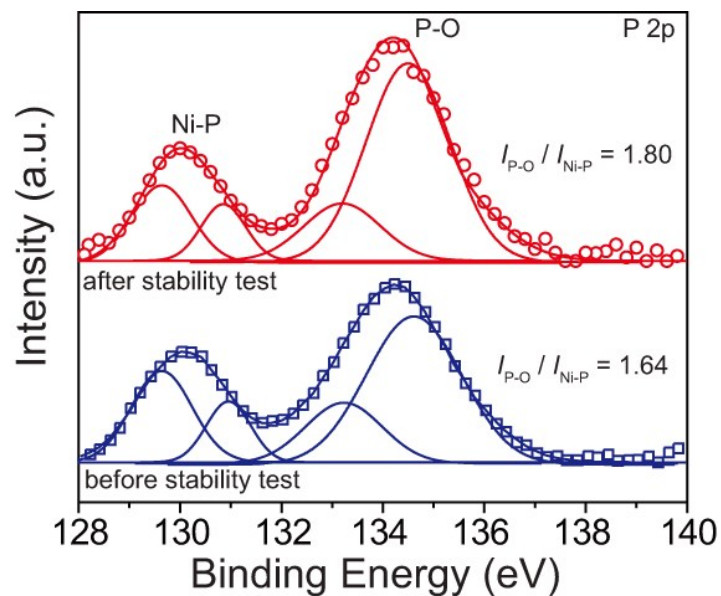

**Fig. S14.** XPS P 2p core-level of the NiP/NiFeP/C after stability test.

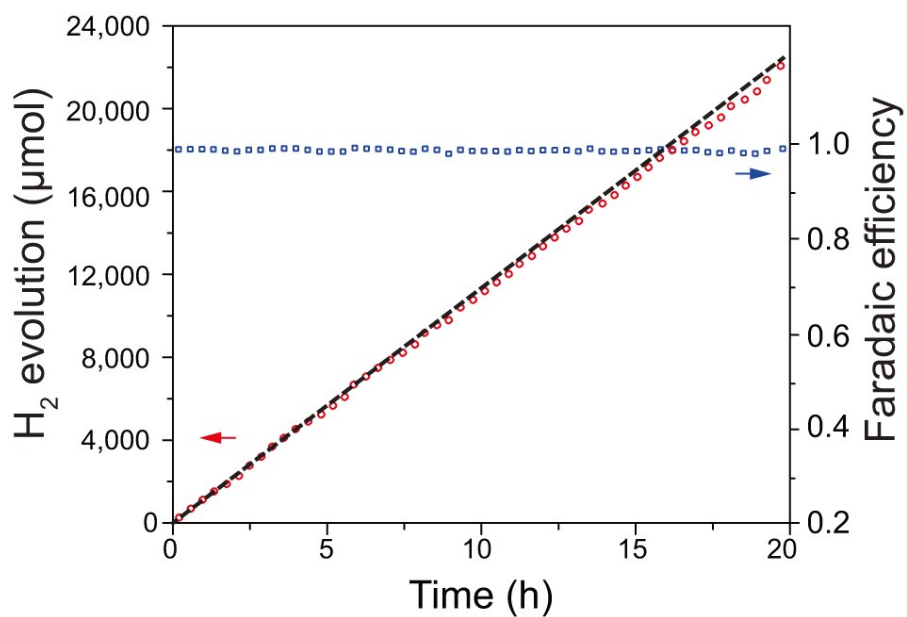

**Fig. S15.** Hydrogen evolution rate and Faradaic efficiency from gas chromatography measurement for the bifunctional NiP/NiFeP/C catalyst in a two-electrode overall water splitting system.



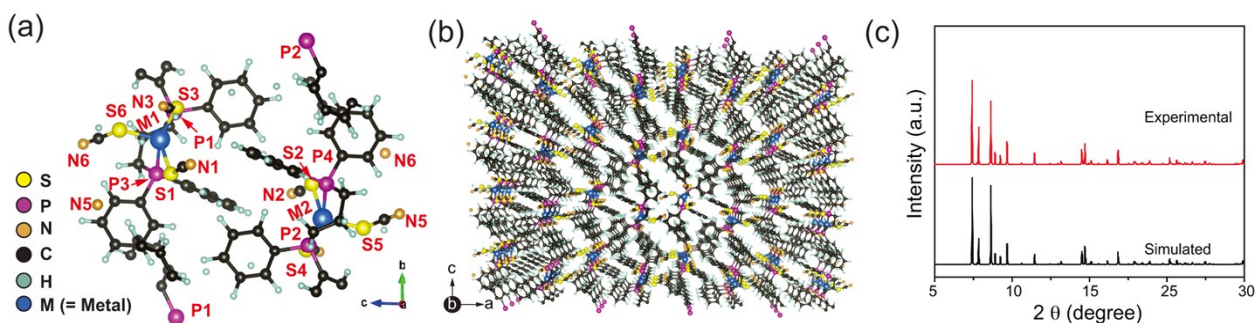

**Fig. S16.** (a) Unit-cell content of the crystal structure of the Mo, W-MOF with atoms labeled. Hydrogen and carbon atoms are not labeled for clarity. (b) The crystal structure of Mo, W-MOF with  $4 \times 4 \times 3$  unit cells ( $b \times c \times a$ ). (c) Experimental and simulated XRD patterns of Mo, W-MOF.

Compared to Ni, Fe-MOF, the Mo, W-MOF uses the thiocyanate rather than 1,3-bis(4-pyridyl)propane linkers to reduce the carbon content and introduce S into the obtained electrocatalysts. Each Mo/W atom coordinates three N atoms, three S atoms, and two P atoms, while adjacent TM atoms are separated with at least two benzene rings. The experimental and simulated XRD patterns match closely, indicating a high crystal purity for the synthesized samples.

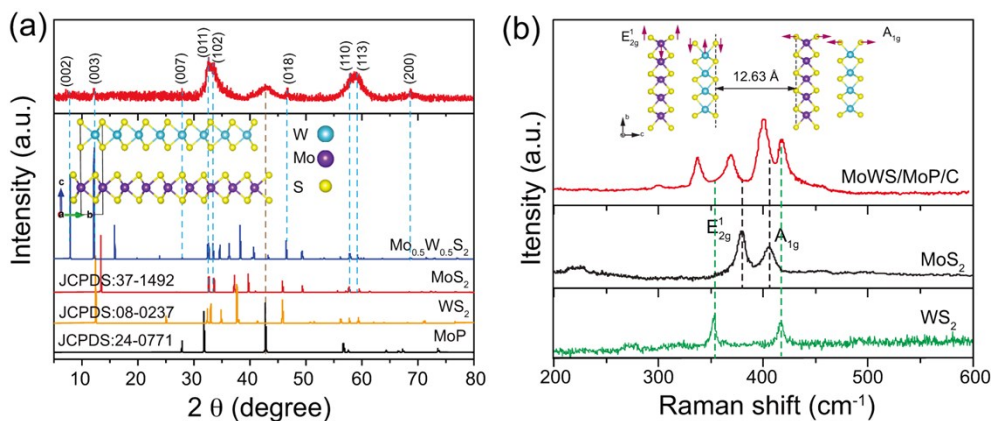

**Fig. S17.** (a) XRD patterns of MoWS/MoP/C, and reference diffraction patterns of standard  $\text{Mo}_{0.5}\text{W}_{0.5}\text{S}_2$ ,  $\text{WS}_2$ ,  $\text{MoS}_2$ , and  $\text{MoP}$  are also labeled. (b) Raman spectra of MoWS/MoP/C and  $\text{WS}_2$ ,  $\text{MoS}_2$ . Inserted images in (a) and (b): crystal structure of  $\text{Mo}_{0.5}\text{W}_{0.5}\text{S}_2$ .

The structure of  $\text{Mo}_{0.5}\text{W}_{0.5}\text{S}_2$  is similar to its counterpart, 2H- $\text{MoS}_2$ . In one layer, a plane of Mo (or W) atoms is sandwiched covalently between two planes of S atoms in a trigonal prismatic arrangement. The

interaction between layers is dominated by van der waal forces. Each hexahedral layer of 2H-MoS<sub>2</sub> is sandwiched by two layers of 2H-WS<sub>2</sub> hexahedral layers (**Fig. S17a and S17b**, inserted images) with different interlayer spacing of  $\sim 4$  Å and  $\sim 12.6$  Å. While the interlayer spacing of 2H-MoS<sub>2</sub> is 4.6 Å.<sup>S3</sup> It is believed that increasing the interlayer spacing of MoS<sub>2</sub> will tune its electronic structure, and more than 7% expansion will be treated as a two-dimensional single-layer model.<sup>S4</sup> Further Raman characterizations (**Fig. S17b**) confirm the XRD analysis. Raman spectrum of MoWS/MoP/C exhibits four distinct peaks at 417.9, 400.0, 368.8, and 339.1 cm<sup>-1</sup>, and the peaks located at 400.0 and 368.8 cm<sup>-1</sup> correspond to the out-of-plane Mo-S phonon mode (A<sub>1g</sub>) and the in-plane Mo-S mode (E<sub>2g</sub><sup>1</sup>) of typical MoS<sub>2</sub>-layered structure, respectively. While the peaks located at 417.9 and 339.1 cm<sup>-1</sup> are ascribed to the A<sub>1g</sub> and E<sub>2g</sub><sup>1</sup> of typical WS<sub>2</sub>-layered structure, respectively.<sup>S5</sup> The Raman spectra also show red-shift of the A<sub>1g</sub> and E<sub>2g</sub><sup>1</sup> peaks, which results from the greatly expanded interlayer spacing. Notably, compared to Raman spectra of pristine MoS<sub>2</sub> and WS<sub>2</sub>, the integrated intensity of A<sub>1g</sub> is almost 3.5 times higher than that of E<sub>2g</sub><sup>1</sup>, so the obtained MoWS/MoP/C sample favors the vibration of A<sub>1g</sub> mode and displays the highly exposed edge sites.

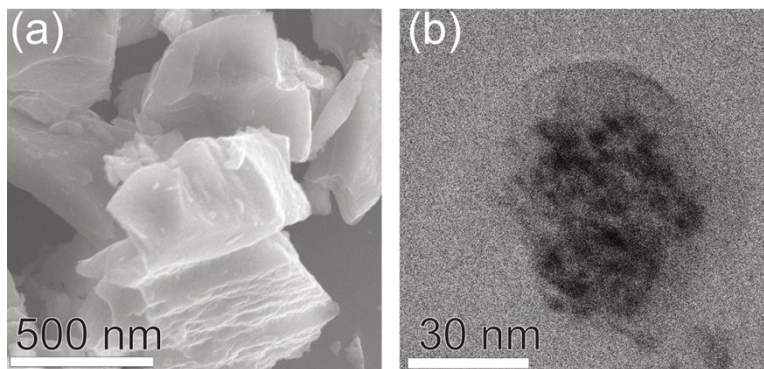

**Fig. S18.** SEM (a) and TEM (b) images of the obtained MoWS/MoP/C.

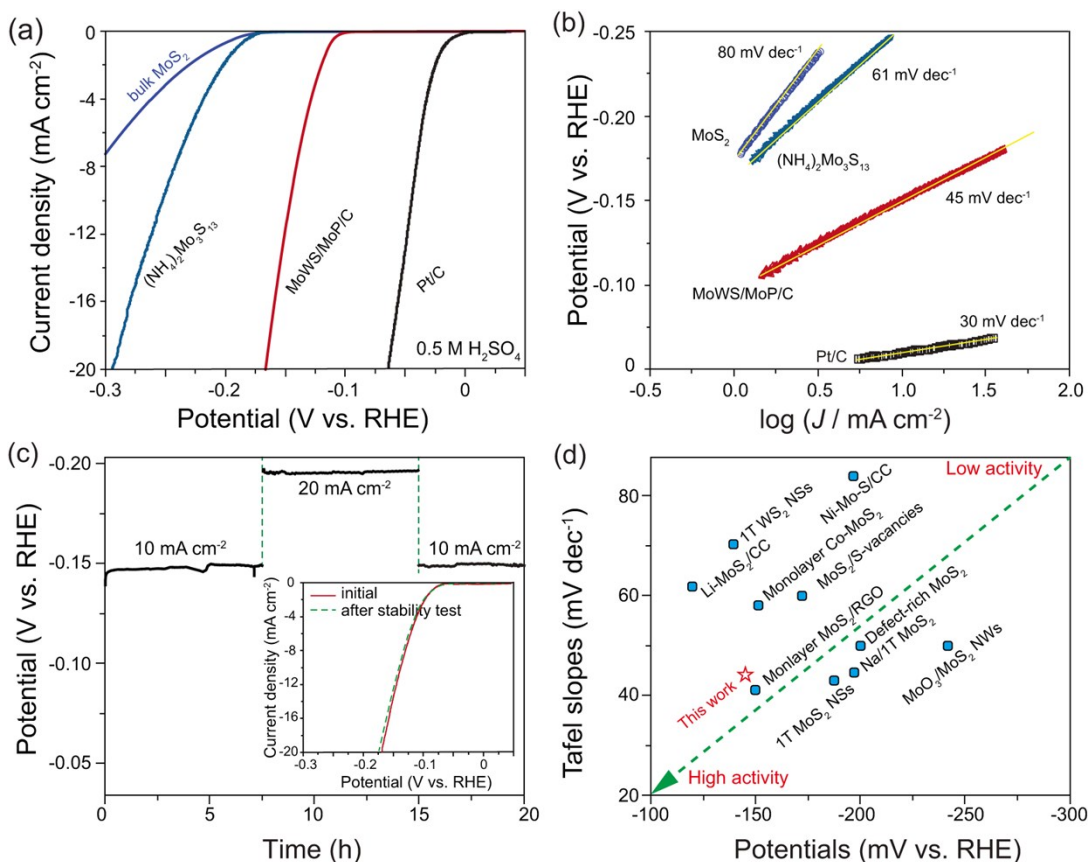

**Fig. S19.** (a) Polarization curves of MoWS/MoP/C, MoS<sub>2</sub>, and (NH<sub>4</sub>)<sub>2</sub>Mo<sub>3</sub>S<sub>13</sub> for HER in 0.5 M H<sub>2</sub>SO<sub>4</sub>. (b) Corresponding Tafel plots. (c) Durability test for MoWS/MoP/C sample at -10 mA cm<sup>-2</sup> and -20 mA cm<sup>-2</sup> for 20 h and its corresponding polarization curves (inserted plot). (d) Comparison of the electrochemical activities (Tafel slopes and potentials at -10 mA cm<sup>-2</sup>) with the reported MoS<sub>2</sub> nanostructures, such as Li-MoS<sub>2</sub>/CC,<sup>S6</sup> 1T-WS<sub>2</sub> NSs,<sup>S7</sup> Ni-Mo-S/CC,<sup>S8</sup> monolayer Co-MoS<sub>2</sub>/CC,<sup>S9</sup> MoS<sub>2</sub>/S-vacancies,<sup>S10</sup> monolayer MoS<sub>2</sub>/rGO,<sup>S11</sup> Na/1T-MoS<sub>2</sub>,<sup>S12</sup> Defect-rich MoS<sub>2</sub>,<sup>S13</sup> MoO<sub>3</sub>/MoS<sub>2</sub> NWs,<sup>S14</sup> and 1T-MoS<sub>2</sub> NSs.<sup>S15</sup> CC: carbon cloth, NWs: nanowires, NSs: nanosheets.

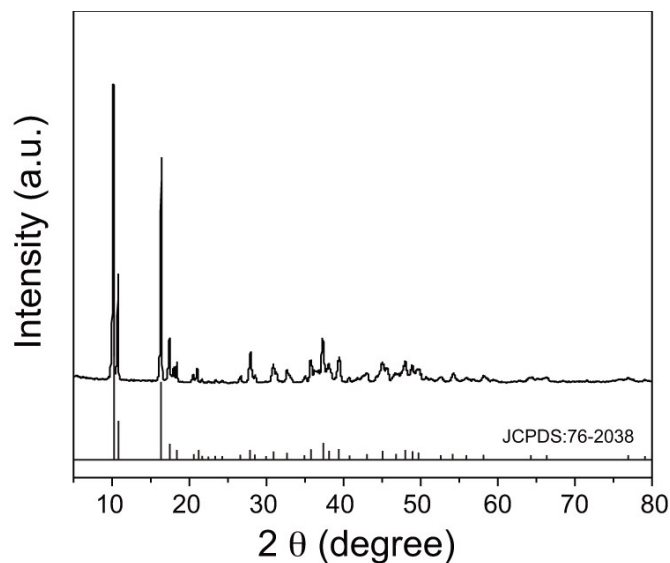

**Fig. S20.** XRD pattern of the synthesized  $(\text{NH}_4)_2\text{Mo}_3\text{S}_{13}\cdot n\text{H}_2\text{O}$  with a reference spectrum displayed at the bottom (Joint Commission for Powder Diffraction Standards (JCPDS): #76-2038).

**Table S1** Comparison of HER performance for NiP/NiFeP/C with other reported non-noble electrocatalysts in 0.5 M  $\text{H}_2\text{SO}_4$ .

| Samples                                         | Potential (mV vs. RHE) at 10 mA $\text{cm}^{-2}$ | Loading amount ( $\text{mg cm}^{-2}$ ) | Tafel slope ( $\text{mV dec}^{-1}$ ) | References                                                        |
|-------------------------------------------------|--------------------------------------------------|----------------------------------------|--------------------------------------|-------------------------------------------------------------------|
| NiP/NiFeP/C                                     | -87                                              | 0.168                                  | 38                                   | <i>This work</i>                                                  |
| S-CoWP@(S,N)-C                                  | -35                                              | 0.75                                   | 35                                   | <i>ACS Energy Lett.</i> , <b>2018</b> , <i>3</i> , 1434–1442.     |
| CoPS NSs on carbon cloth                        | -48                                              | N/A                                    | 56                                   | <i>Nature Materials</i> , <b>2015</b> , <i>14</i> , 1245-1251     |
| WP nanowires on carbon cloth                    | -130                                             | 2.00                                   | 69                                   | <i>ACS Appl. Mater. Interfaces</i> <b>2014</b> , <i>6</i> , 21874 |
| P- $\text{Mo}_2\text{C}/\text{C}$               | -89                                              | 1.30                                   | 42                                   | <i>Energy Environ. Sci.</i> <b>2017</b> , <i>10</i> , 1262-1271   |
| EG/ $\text{Co}_{0.85}\text{Se}/\text{NiFe-LDH}$ | -225                                             | 4.00                                   | 160                                  | <i>Energy Environ. Sci.</i> <b>2016</b> , <i>9</i> , 478–483      |
| Ultrathin $\text{NiFeS}_x$ nanosheets           | -107                                             | 25±2                                   | 40                                   | <i>J. Am. Chem. Soc.</i> <b>2015</b> , <i>137</i> , 11900–11903   |
| $\text{CoWS}_x$                                 | -238                                             | N/A                                    | N/A                                  | <i>Energy Environ. Sci.</i>                                       |

|                                            |      |      |     |                                                  |
|--------------------------------------------|------|------|-----|--------------------------------------------------|
|                                            |      |      |     | 2013, 6, 2452–2459                               |
| WP NPs@NC                                  | -102 | 2.0  | 58  | <i>J. Mater. Chem. A</i> 2016, 4, 15327          |
| P-WN/rGO                                   | -85  | 0.34 | 54  | <i>Angew. Chem. Int. Ed.</i> 2015, 54, 6325–6329 |
| MoP S                                      | -64  | 1.00 | N/A | <i>Angew. Chem.</i> 2014, 126, 14661–14665       |
| MPSA/GO                                    | -163 | 0.30 | 89  | <i>Angew. Chem. Int. Ed.</i> 2016, 55, 2230–2234 |
| MoS <sub>2</sub> sheet stacks              | -106 | 3.00 | 59  | <i>Energy Environ. Sci.</i> 2017, 10, 593–603    |
| NiP <sub>1.93</sub> Se <sub>0.07</sub> /GD | -102 | N/A  | 42  | <i>ACS Catal.</i> 2015, 5, 6355–6361             |
| Co-NG                                      | -147 | 0.29 | 82  | <i>Nat. Commun.</i> 2015, 6:8668                 |

**Table S2** Electrochemical properties of NiP-mc, NiP/NiFeP/C, and NiP/C samples.

| Samples     | $C_{dl}$ (mF cm <sup>-2</sup> ) | $J_{0,geometrical}$ (mA cm <sup>-2</sup> ) | $J_{0,normalized}$ (mA cm <sup>-2</sup> ) |
|-------------|---------------------------------|--------------------------------------------|-------------------------------------------|
| NiP-mc      | 51.4                            | 0.486                                      | 0.009                                     |
| NiP/NiFeP/C | 35.9                            | 0.723                                      | 0.020                                     |
| NiP/C       | 32.3                            | 0.402                                      | 0.012                                     |

**Table S3** Comparison of HER performance for NiP/NiFeP/C with other reported non-noble electrocatalysts in 1.0 M KOH.

| Samples        | Potential (mV vs. RHE) at -10 mA cm <sup>-2</sup> | Loading amount (mg cm <sup>-2</sup> ) | Tafel slope (mV dec <sup>-1</sup> ) | References                                            |
|----------------|---------------------------------------------------|---------------------------------------|-------------------------------------|-------------------------------------------------------|
| NiP/NiFeP/C    | -138                                              | 0.168                                 | 68                                  | <i>This work</i>                                      |
| S-CoWP@(S,N)-C | -61                                               | 0.75                                  | 61                                  | <i>ACS Energy Lett.</i> , <b>2018</b> , 3, 1434–1442. |
| 2.5H-PHNCMs    | -70                                               | 1.00                                  | 38.1                                | <i>Nat. Commun.</i> 2017, 8,                          |

|                                                        |      |             |      | 15377                                             |
|--------------------------------------------------------|------|-------------|------|---------------------------------------------------|
| EG/Co <sub>0.85</sub> Se/NiFe-LDH                      | -260 | 4.00        | 160  | <i>Energy Environ. Sci.</i> 2016, 9, 478--483     |
| Ni/NiP                                                 | -130 | 10.58-11.04 | 58.5 | <i>Adv. Funct. Mater.</i> 2016, 26, 3314–3323     |
| CoP nanowires on carbon cloth                          | -210 | 0.92        | 51   | <i>J. Am. Chem. Soc.</i> 2014, 136, 7587          |
| WP nanowires on carbon cloth                           | 150  | 2.00        | 102  | <i>ACS Appl. Mater. Interfaces</i> 2014, 6, 21874 |
| NiFe-LDH                                               | -210 | N/A         | N/A  | <i>Science</i> 2014, 345, 1593                    |
| MOF derived MoC <sub>x</sub>                           | -151 | 0.14        | 59   | <i>Nat. Commun.</i> 2016, 6, 6512                 |
| N,S-CNT                                                | -450 | N/A         | 133  | <i>Adv. Energy Mater.</i> 2017, 1602068           |
| CoO <sub>x</sub> /CN                                   | -270 | 0.85        | 115  | <i>J. Am. Chem. Soc.</i> 2015, 137, 2688          |
| CP/CTs/Co-S                                            | -190 | 0.32        | 101  | <i>ACS Nano</i> , 2016, 2342–2348                 |
| PCPTF                                                  | -370 | 0.10        | 53   | <i>Adv. Mater.</i> 2015, 27, 3175–3180            |
| Co <sub>9</sub> S <sub>8</sub> @MoS <sub>2</sub> /CNFs | -190 | 0.212       | 110  | <i>Adv. Mater.</i> 2015, 27, 4752–4759            |

**Table S4** Comparison of OER performance for NiP/NiFeP/C with recently reported catalysts in alkaline solution.

| Samples                                       | Potential (V vs. RHE) at 10 mA cm <sup>-2</sup> | Tafel slope (mV dec <sup>-1</sup> ) | TOF (s <sup>-1</sup> ) | Loading amount (mg cm <sup>-2</sup> ) | References                                 |
|-----------------------------------------------|-------------------------------------------------|-------------------------------------|------------------------|---------------------------------------|--------------------------------------------|
| NiP/NiFeP/C*                                  | 1.48                                            | 58                                  | 0.133 @1.51 V          | 0.168                                 | <i>This work</i>                           |
| NiFe-LDH-rGO                                  | 1.53                                            | 82                                  | 0.1 @ 1.53V            | 0.25                                  | <i>ACS Nano</i> <b>2015</b> , 9, 1977-1984 |
| G-FeCoW <sup>#</sup> on Au coated nickel foam | 1.45                                            | N/A                                 | 0.46 @1.53 V           | 0.21                                  | <i>Science</i> <b>2016</b> , 352, 333-337  |

|                                                      |       |     |       |                  |                                                         |
|------------------------------------------------------|-------|-----|-------|------------------|---------------------------------------------------------|
| CoNi-P on nickel foam                                | 1.50  | 52  | N/A   | 0.153            | <i>Energy Environ. Sci.</i> <b>2017</b> , 10, 893-899   |
| NiCeO <sub>x</sub> on Au                             | 1.50  | N/A | 0.08  | ~0.13<br>@1.51 V | <i>Nature Energy</i> <b>2016</b> , 1, 16053             |
| Ni <sub>2</sub> P/Ni on nickel foam <sup>#</sup>     | 1.43  | N/A | 0.015 | N/A<br>@1.58 V   | <i>ACS Catal.</i> <b>2016</b> , 6, 714-721              |
| NiPS <sub>3</sub> @NiOOH                             | 1.58  | 80  | N/A   | 0.126            | <i>ACS Catal.</i> <b>2017</b> , 7, 229-237              |
| LT-LiCoO <sub>2</sub>                                | 1.66  | 48  | N/A   | 0.32             | <i>Energy Environ. Sci.</i> <b>2016</b> , 9, 184-192    |
| NiD-PCC                                              | 1.59  | 98  | N/A   | N/A              | <i>Energy Environ. Sci.</i> <b>2016</b> , 9, 3411-3416  |
| Ni <sub>3</sub> Se <sub>2</sub>                      | 1.54  | 97  | N/A   | 0.217            | <i>Energy Environ. Sci.</i> <b>2016</b> , 9, 1771--1782 |
| FeNi@NC                                              | 1.51  | 70  | N/A   | 0.32             | <i>Energy Environ. Sci.</i> <b>2016</b> , 9, 123--129   |
| Ni-P nanoplates                                      | 1.53  | 64  | N/A   | 0.20             | <i>Energy Environ. Sci.</i> <b>2016</b> , 9, 1246--1250 |
| De-LCoP@5.1 V                                        | 1.654 | 73  | N/A   | 0.50             | <i>Energy Environ. Sci.</i> <b>2015</b> , 8, 1719--1724 |
| LT-LiCoO <sub>2</sub>                                | 1.61  | 52  | N/A   | 0.25             | <i>Nat. Commun.</i> <b>2014</b> , 5, 3949               |
| LiNi <sub>0.8</sub> Al <sub>0.2</sub> O <sub>2</sub> | 1.58  | 44  | N/A   | 0.051            | <i>Adv. Mater.</i> <b>2015</b> , 27, 6063-6067          |
| NiV-LDH                                              | 1.55  | 64  | 0.054 | 0.143<br>@1.58 V | <i>Nat. Commun.</i> <b>2016</b> , 7, 11981              |
| CoMn-LDH                                             | 1.53  | 43  | 0.075 | 0.222<br>@ 1.53V | <i>J. Am. Chem. Soc.</i> <b>2014</b> , 136, 16481-16484 |
| NiCo-LDH                                             | 1.62  | 59  | 0.05  | 0.07<br>@ 1.53V  | <i>Nat. Commun.</i> <b>2014</b> , 5, 4477               |
| NiFe*                                                | 1.65  | N/A | 0.075 | N/A<br>@1.63 V   | <i>Nat. Commun.</i> <b>2015</b> , 6, 6616               |
| Co <sub>3</sub> O <sub>4</sub> /rm-GO                | 1.54  | 67  | N/A   | 0.17             | <i>Nat. Mater.</i> <b>2011</b> , 10, 780                |
| N-doped graphene-CoO                                 | 1.57  | 71  | N/A   | N/A              | <i>Energy Environ. Sci.</i> <b>2014</b> , 7, 609        |

\* on glassy carbon; <sup>#</sup> TOF estimated according to electrochemical active sites not all the metal cations.

## References

- [S1] Z. Shi, K. Nie, Z. J. Shao, B. Gao, H. Lin, H. Zhang, B. Liu, Y. Wang, Y. Zhang, X. Sun, *Energy Environ. Sci.* **2017**, *10*, 1487.
- [S2] M. Cabán-Acevedo, M. L. Stone, J. R. Schmidt, J. G. Thomas, Q. Ding, H. C. Chang, M. L. Tsai, J. H. He, J. Jin, *Nat. mat.* **2015**, *14*, 1245.
- [S3] B. Hinnemann, P.G. Moses, J. Bonde, K.P. Jørgensen, J.H. Nielsen, S. Horch, I. Chorkendorff, J. K. Nørskov, *J. Am. Chem. Soc.* **2005**, *127*, 5308.
- [S4] K. Kobayashi, J. Yamauchi, *Phys. Rev. B* **1995**, *51*, 17085.
- [S5] N. H. Attanayake, A. C. Thenuwara, A. Patra, Y. V. Aulin, T. M. Tran, H. Chakraborty, E. Borguet, M. L. Klein, J. P. Perdew, D. R. Strongin, *ACS Energy Lett.* **2018**, *3*, 7.
- [S6] H. Wang, Z. Lu, S. Xu, D. Kong, J. J. Cha, G. Zheng, P. C. Hsu, K. Yan, D. Bradshaw, F. B. Prinz, Y. Cui, *PNAS.* **2013**, *110*, 19701.
- [S7] M. A. Lukowski, A. S. Daniel, C. R. English, F. Meng, A. Forticaux, R. J. Hamers, S. Jin, *Energy Environ. Sci.* **2014**, *7*, 2608.
- [S8] J. Miao, F. X. Xiao, H. B. Yang, S. Y. Khoo, J. Chen, Z. Fan, Y. Y. Hsu, H. M. Chen, H. Zhang, B. Liu, *Sci. Adv.* **2015**, *1*, e1500259.
- [S9] X. Hai, W. Zhou, S. Wang, H. Pang, K. Chang, F. Ichihara, J. Ye, *Nano Energy* **2017**, *39*, 409.
- [S10] H. Li, C. Tsai, A. L. Koh, L. Cai, A. W. Contryman, A. H. Fragapane, J. Zhao, H. S. Han, H. C. Manoharan, F. Abild-Pedersen, *Nat. Mater.* **2016**, *15*, 48.
- [S11] Y. Li, H. Wang, L. Xie, Y. Liang, G. Hong, H. Dai, *J. Am. Chem. Soc.* **2011**, *133*, 7296.
- [S12] N. H. Attanayake, A. C. Thenuwara, A. Patra, Y. V. Aulin, T. M. Tran, H. Chakraborty, E. Borguet, M. L. Klein, J. P. Perdew, D. R. Strongin, *ACS Energy Lett.* **2018**, *3*, 7.
- [S13] J. Xie, H. Zhang, S. Li, R. Wang, X. Sun, M. Zhou, J. Zhou, X. W. Lou, Y. Xie, *Adv. Mater.* **2013**, *25*, 5807.
- [S14] Z. Chen, D. Cummins, B. N. Reinecke, E. Clark, M. K. Sunkara, T. F. Jaramillo, *Nano Lett.* **2011**, *11*, 4168.
- [S15] M. A. Lukowski, A. S. Daniel, F. Meng, A. Forticaux, L. Li, S. Jin, *J. Am. Chem. Soc.* **2013**, *135*, 10274.
